# Supplementary material
Source: PubMed Central journal article supplement (PMC6604087)
Supplement: jamaoncol-5-1325-s001.pdf [file jamaoncol-5-1325-s001.pdf]

## Supplementary Online Content

Roberts ME, Ranola JMO, Marshall ML, et al. Comparison of *CDH1* penetrance estimates in clinically ascertained families vs families ascertained for multiple gastric cancers. *JAMA Oncol*. Published online June 27, 2019.  
doi:10.1001/jamaoncol.2019.1208

**eTable 1.** Previously Published Penetrance Estimates

**eTable 2.** Unique Germline *CDH1* Pathogenic Variants Identified

**eTable 3.** Gastric Cancer Observed by Age in Men From 41 Pedigrees With expected Cancers by Age Based on SEER Data and Estimated Cumulative Risk Presented for Comparison

**eTable 4.** Gastric Cancers Observed by Age in Women From 41 Pedigrees With Expected Cancers by Age Based on SEER Data and Estimated Cumulative Risk Presented for Comparison

**eTable 5.** Breast Cancer Observed by Age in Women From 41 Pedigrees With Expected Cancers by Age Based on SEER Data and Estimated Cumulative Risk Presented for Comparison

**eFigure.** Germline Pathogenic Variants Identified

This supplementary material has been provided by the authors to give readers additional information about their work.

**eTable 1. Previously Published Penetrance Estimates**

|                                                          | Hansford 2015<br>% (95% CI)                                                                                                                                                        |             | Kaurah 2007<br>% (95% CI)                                                                                                                                                                                             |             | Pharoah 2001<br>% (95% CI)                                                                                                                                                  |             |
|----------------------------------------------------------|------------------------------------------------------------------------------------------------------------------------------------------------------------------------------------|-------------|-----------------------------------------------------------------------------------------------------------------------------------------------------------------------------------------------------------------------|-------------|-----------------------------------------------------------------------------------------------------------------------------------------------------------------------------|-------------|
|                                                          | Male                                                                                                                                                                               | Female      | Male                                                                                                                                                                                                                  | Female      | Male                                                                                                                                                                        | Female      |
| <b>Gastric</b>                                           | 70% (59-80)                                                                                                                                                                        | 56% (44-69) | 40% (12-91)                                                                                                                                                                                                           | 63% (19-99) | 67% (39-99)                                                                                                                                                                 | 83% (58-99) |
| <b>Breast</b>                                            | --                                                                                                                                                                                 | 42% (23-68) | --                                                                                                                                                                                                                    | 52% (29-94) | --                                                                                                                                                                          | 39% (12-84) |
| <b>Ascertainment</b>                                     | N = 75 Families<br>17* from this study & 58 from the literature<br>Inclusion Criteria: 2010 IGCLC criteria.* Sample with a mean of 4 and a median of 3 gastric cancers per family. |             | N = 4 Families (All four families had CDH1 c.2398delC)<br>Inclusion Criteria: Clinical diagnosis of HDGC based on previously established clinical criteria.^ All 4 families were reported to have ≥3 gastric cancers. |             | N = 11 Families<br>Inclusion Criteria: At least 3 cases of diffuse gastric cancer, and at least 1 affected family member who tested positive for a CDH1 pathogenic variant. |             |
| *Fitzgerald 2010<br>^Brooks-Wilson 2004 and Suriano 2005 |                                                                                                                                                                                    |             |                                                                                                                                                                                                                       |             |                                                                                                                                                                             |             |

**eTable 2. Unique Germline *CDH1* Pathogenic Variants Identified**

| Domain             | Gene | Variant                              | Variant Type             |
|--------------------|------|--------------------------------------|--------------------------|
| Protein Signal     | CDH1 | c.48+1G>A                            | Canonical Splice         |
| Precursor Sequence | CDH1 | c.202delT (p.Tyr68IlefsX15)          | Frameshift               |
|                    | CDH1 | c.208dupT (p.Ser70PhefsX24)          | Frameshift               |
|                    | CDH1 | c.220C>T (p.Arg74Ter)                | Nonsense                 |
|                    | CDH1 | c.315delC (p.Thr106ProfsX11)         | Frameshift               |
|                    | CDH1 | c.337A>T (p.Lys113Ter)               | Nonsense                 |
|                    | CDH1 | c.455_465del11 (p.Gln152LeufsX12)    | Frameshift               |
| Cadherin 1         | CDH1 | c.467G>A (p.Trp156Ter)               | Nonsense                 |
|                    | CDH1 | c.468G>A (p.Trp156Ter)               | Nonsense                 |
|                    | CDH1 | c.489C>A (p.Cys163Ter)               | Nonsense                 |
|                    | CDH1 | c.521dupA (p.Asn174LysfsX25)         | Frameshift               |
|                    | CDH1 | c.687+1G>C                           | Canonical Splice         |
|                    | CDH1 | c.707C>A (p.Ser236Ter)               | Nonsense                 |
| Cadherin 2         | CDH1 | c.833-2A>G                           | Canonical Splice         |
|                    | CDH1 | c.1003C>T (p.Arg335Ter)              | Nonsense                 |
|                    | CDH1 | c.1031_1032dupTG (p.Val345TrpfsX12)  | Frameshift               |
| Cadherin 3         | CDH1 | c.1137+1G>A                          | Canonical Splice         |
|                    | CDH1 | c.1137G>A (p.Thr379=)                | Cryptic Splice           |
|                    | CDH1 | c.1312delA (p.Thr438GlnfsX17)        | Frameshift               |
|                    | CDH1 | c.1320+1G>A                          | Canonical Splice         |
|                    | CDH1 | c.1320+1G>C                          | Canonical Splice         |
|                    | CDH1 | c.1354_1357delCTAC (p.Leu452ThrfsX2) | Frameshift               |
| Cadherin 4         | CDH1 | c.1476_1477delAG (p.Arg492SerfsX44)  | Frameshift               |
|                    | CDH1 | c.1553_1565+39del52                  | Intronic/Exonic Deletion |
|                    | CDH1 | c.1565+1delG                         | Canonical Splice         |
|                    | CDH1 | c.1565+1G>A                          | Canonical Splice         |
|                    | CDH1 | c.1565+2_1565+3insTT                 | Canonical Splice         |
|                    | CDH1 | c.1578G>A (p.Trp526Ter)              | Nonsense                 |
|                    | CDH1 | c.1587dupT (p.Ala530CysfsX7)         | Frameshift               |
|                    | CDH1 | c.1590dupC (p.Asn531GlnfsX6)         | Frameshift               |
|                    | CDH1 | c.1679C>G (p.Thr560Arg)              | Cryptic Splice           |
|                    | CDH1 | c.1711+1G>C                          | Canonical Splice         |
|                    | CDH1 | c.1733dupC (p.Gly579ArgfsX9)         | Frameshift               |
|                    | CDH1 | c.1746dupG (p.Leu583AlafsX5)         | Frameshift               |
|                    | CDH1 | c.1779dupC (p.Ile594HisfsX11)        | Frameshift               |

|                                                                                                    |      |                                                 |                   |
|----------------------------------------------------------------------------------------------------|------|-------------------------------------------------|-------------------|
| Cadherin 5                                                                                         | CDH1 | c.1792C>T (p.Arg598Ter)                         | Nonsense          |
|                                                                                                    | CDH1 | c.1979dupT (p.Asp662Ter)                        | Nonsense          |
|                                                                                                    | CDH1 | c.1999delC (p.Leu667SerfsX12)                   | Frameshift        |
|                                                                                                    | CDH1 | c.2064_2065delTG (p.Cys688Ter)                  | Nonsense          |
| Transmembrane                                                                                      | CDH1 | c.2164+2T>C                                     | Canonical Splice  |
| Cytoplasmic                                                                                        | CDH1 | c.2195G>A (p.Arg732Gln)                         | Cryptic Splice    |
|                                                                                                    | CDH1 | c.2276delG (p.Gly759GlufsX11)                   | Frameshift        |
|                                                                                                    | CDH1 | c.2287G>T (p.Glu763Ter)                         | Nonsense          |
|                                                                                                    | CDH1 | c.2398delC (p.Arg800AlafsX16) <sup>^</sup>      | Frameshift        |
|                                                                                                    | CDH1 | c.2430delT (p.Phe810LeufsX6) <sup>*</sup>       | Frameshift        |
|                                                                                                    | CDH1 | c.2446A>T (p.Lys816Ter) <sup>*</sup>            | Nonsense          |
|                                                                                                    | CDH1 | Deletion Exons 1-2                              | Large Deletion    |
|                                                                                                    | CDH1 | Deletion Exon 3                                 | Large Deletion    |
|                                                                                                    | CDH1 | Duplication Exon 3                              | Large Duplication |
|                                                                                                    | CDH1 | Deletion Exons 4-6                              | Large Deletion    |
|                                                                                                    | CDH1 | Deletion Exons 7-8                              | Large Deletion    |
|                                                                                                    | CDH1 | Deletion Exon 16 with Extension into the 3' UTR | Large Deletion    |
| *NMD=No; upstream of most 3' truncating variant (c.2506G>T, p.Glu836Ter) published (Krempely 2018) |      |                                                 |                   |
| <sup>^</sup> Newfoundland founder variant (Kaurah 2007)                                            |      |                                                 |                   |

**eTable 3. Gastric Cancer Observed by Age in Men From 41 Pedigrees With Expected Cancers by Age Based on SEER Data and Estimated Cumulative Risk Presented for Comparison.**

| MALE gastric cancer           |                                    |             |                      |     |             |                      |      |             |                      |          |             |                      |    |             |                      |                 |         |        |                 |
|-------------------------------|------------------------------------|-------------|----------------------|-----|-------------|----------------------|------|-------------|----------------------|----------|-------------|----------------------|----|-------------|----------------------|-----------------|---------|--------|-----------------|
| Age range for pedigree counts | Probability of CDH1 from pedigree* |             |                      |     |             |                      |      |             |                      |          |             |                      |    |             |                      | Cumulative risk |         |        |                 |
|                               | 1                                  |             |                      | 0.5 |             |                      | 0.25 |             |                      | 0.25>x>0 |             |                      | 0  |             |                      | Age             | SEER    | CDH1   | 95% CI          |
|                               | n                                  | with cancer | SEER expected cancer | n   | with cancer | SEER expected cancer | n    | with cancer | SEER expected cancer | n        | with cancer | SEER expected cancer | n  | with cancer | SEER expected cancer |                 |         |        |                 |
| <25                           | 13                                 | 0           | 0                    | 42  | 0           | 0                    | 27   | 1           | 0                    | 22       | 0           | 0                    | 23 | 0           | 0                    | 25              | 0       | 0.0005 | (0.0003,0.0007) |
| 26-35                         | 4                                  | 0           | 0.00004              | 12  | 0           | 0.00012              | 13   | 0           | 0.00013              | 11       | 0           | 0.00011              | 2  | 0           | 0.00012              | 30              | 0.00001 | 0.0018 | (0.0012,0.0027) |
| 36-45                         | 9                                  | 1           | 0.00018              | 11  | 3           | 0.00022              | 7    | 3           | 0.00034              | 16       | 1           | 0.00032              | 6  | 0           | 0.00032              | 40              | 0.00002 | 0.0095 | (0.0061,0.0142) |
| 46-55                         | 11                                 | 1           | 0.00077              | 17  | 4           | 0.00119              | 3    | 1           | 0.00161              | 29       | 1           | 0.00203              | 7  | 0           | 0.00049              | 50              | 0.00007 | 0.0347 | (0.0224,0.0516) |
| 56-65                         | 12                                 | 2           | 0.00204              | 24  | 2           | 0.00408              | 30   | 5           | 0.0051               | 9        | 1           | 0.00153              | 10 | 0           | 0.0017               | 60              | 0.00017 | 0.0987 | (0.0646,0.1447) |
| 66-75                         | 5                                  | 0           | 0.0018               | 21  | 1           | 0.00756              | 2    | 2           | 0.01152              | 16       | 2           | 0.00576              | 2  | 0           | 0.00792              | 70              | 0.00036 | 0.2270 | (0.1523,0.3214) |
| 76+                           | 3                                  | 1           | 0.00183              | 18  | 1           | 0.01098              | 19   | 0           | 0.01159              | 2        | 0           | 0.00122              | 8  | 0           | 0.00488              | 80              | 0.00061 | 0.4210 | (0.2952,0.5616) |

\* Probability of having a pathogenic CDH1 variant is calculated using relationship to known carriers for ungenotyped individuals

**eTable 4. Gastric Cancers Observed by Age in Women From 41 Pedigrees With Expected Cancers by Age Based on SEER Data and Estimated Cumulative Risk Presented for Comparison.**

| FEMALE gastric cancer         |                                    |             |                      |     |        |                      |      |             |                      |          |             |                      |   |             |                      |     |         |                 |                 |  |
|-------------------------------|------------------------------------|-------------|----------------------|-----|--------|----------------------|------|-------------|----------------------|----------|-------------|----------------------|---|-------------|----------------------|-----|---------|-----------------|-----------------|--|
| Age range for pedigree counts | Probability of CDH1 from pedigree* |             |                      |     |        |                      |      |             |                      |          |             |                      |   |             |                      |     |         | Cumulative risk |                 |  |
|                               | 1                                  |             |                      | 0.5 |        |                      | 0.25 |             |                      | 0.25>x>0 |             |                      | 0 |             |                      | Age | SEER    | CDH1            | CDH1 95% CI     |  |
|                               | n                                  | with cancer | SEER expected cancer | n   | cancer | SEER expected cancer | n    | with cancer | SEER expected cancer | n        | with cancer | SEER expected cancer | n | with cancer | SEER expected cancer |     |         |                 |                 |  |
| <25                           | 9                                  | 0           | 0                    | 3   | 2      | 0                    | 2    | 2           | 0                    | 2        | 0           | 0                    | 1 | 0           | 0                    | 25  | 0       | 0.0010          | (0.0006,0.0014) |  |
| 26-35                         | 14                                 | 1           | 0.00014              | 6   | 2      | 0.00006              | 1    | 0           | 0.00017              | 2        | 1           | 0.00021              | 1 | 0           | 0.00019              | 30  | 0.00001 | 0.0027          | (0.0016,0.0038) |  |
| 36-45                         | 15                                 | 2           | 0.0003               | 1   | 1      | 0.00022              | 1    | 0           | 0.00024              | 1        | 1           | 0.00036              | 2 | 0           | 0.00052              | 40  | 0.00002 | 0.0142          | (0.0087,0.0200) |  |
| 46-55                         | 14                                 | 2           | 0.0007               | 1   | 3      | 0.00065              | 3    | 0           | 0.00155              | 3        | 1           | 0.0015               | 1 | 0           | 0.00065              | 50  | 0.00005 | 0.0410          | (0.0252,0.0575) |  |
| 56-65                         | 21                                 | 2           | 0.00168              | 2   | 0      | 0.00168              | 4    | 0           | 0.0032               | 1        | 0           | 0.00088              | 1 | 0           | 0.00096              | 60  | 0.00008 | 0.0923          | (0.0574,0.1280) |  |
| 66-75                         | 5                                  | 1           | 0.00085              | 1   | 2      | 0.00272              | 3    | 1           | 0.00629              | 1        | 0           | 0.00187              | 2 | 0           | 0.0034               | 70  | 0.00017 | 0.1810          | (0.1147,0.2463) |  |
| 76+                           | 6                                  | 0           | 0.0018               | 1   | 0      | 0.0039               | 2    | 0           | 0.0084               | 2        | 0           | 0.0006               | 1 | 0           | 0.0039               | 80  | 0.0003  | 0.3275          | (0.2147,0.4303) |  |

\* Probability of having a pathogenic CDH1 variant is calculated using relationship to known carriers for ungenotyped individuals

**eTable 5. Breast Cancer Observed by Age in Women From 41 Pedigrees With Expected Cancers by Age Based on SEER Data and Estimated Cumulative Risk Presented for Comparison.**

| FEMALE breast cancer          |                                     |             |                      |     |             |                      |      |             |                      |          |             |                      |    |             |                      |                 |         |        |                 |
|-------------------------------|-------------------------------------|-------------|----------------------|-----|-------------|----------------------|------|-------------|----------------------|----------|-------------|----------------------|----|-------------|----------------------|-----------------|---------|--------|-----------------|
| Age range for pedigree counts | Probability of CDH1 from pedigree * |             |                      |     |             |                      |      |             |                      |          |             |                      |    |             |                      | Cumulative risk |         |        |                 |
|                               | 1                                   |             |                      | 0.5 |             |                      | 0.25 |             |                      | 0.25>x>0 |             |                      | 0  |             |                      | Age             | SEER    | CDH1   | 95% CI          |
|                               | n                                   | with cancer | SEER expected cancer | n   | with cancer | SEER expected cancer | n    | with cancer | SEER expected cancer | n        | with cancer | SEER expected cancer | n  | with cancer | SEER expected cancer |                 |         |        |                 |
| <25                           | 9                                   | 0           | 0.00027              | 3   | 1           | 0.00117              | 2    | 0           | 0.00078              | 2        | 0           | 0.0006               | 1  | 0           | 0.00057              | 25              | 0.00003 | 0.0005 | (0.0003,0.0008) |
| 26-35                         | 14                                  | 1           | 0.00182              | 6   | 0           | 0.00078              | 17   | 0           | 0.00234              | 21       | 0           | 0.00273              | 19 | 0           | 0.00247              | 30              | 0.00013 | 0.0032 | (0.0020,0.0045) |
| 36-45                         | 15                                  | 5           | 0.0111               | 11  | 1           | 0.00814              | 12   | 1           | 0.00888              | 18       | 2           | 0.01332              | 16 | 2           | 0.01924              | 40              | 0.00074 | 0.0285 | (0.0180,0.0403) |
| 46-55                         | 14                                  | 3           | 0.02772              | 3   | 4           | 0.02574              | 31   | 2           | 0.06336              | 30       | 2           | 0.0594               | 13 | 1           | 0.02574              | 50              | 0.00198 | 0.1135 | (0.0728,0.1580) |
| 56-65                         | 21                                  | 6           | 0.05859              | 2   | 5           | 0.05859              | 40   | 5           | 0.11439              | 11       | 5           | 0.03069              | 1  | 3           | 0.03348              | 60              | 0.00279 | 0.2392 | (0.1574,0.3232) |
| 66-75                         | 5                                   | 1           | 0.02165              | 1   | 7           | 0.06928              | 3    | 7           | 0.16021              | 1        | 0           | 0.05629              | 2  | 2           | 0.0866               | 70              | 0.00433 | 0.3983 | (0.2723,0.5163) |
| 76+                           | 6                                   | 2           | 0.0267               | 1   | 1           | 0.05785              | 2    | 1           | 0.1246               | 2        | 1           | 0.0089               | 1  | 0           | 0.05785              | 80              | 0.00445 | 0.5498 | (0.3905,0.6804) |

\* Probability of having a pathogenic CDH1 variant is calculated using relationship to known carriers for ungenotyped individuals

## eFigure 1. Germline Pathogenic Variants Identified

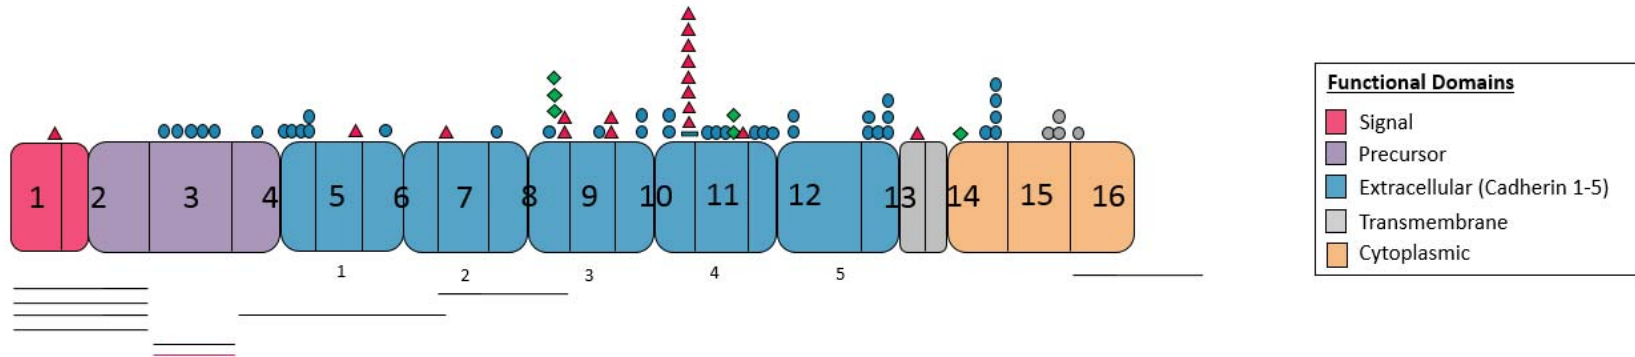

Sequence variants are designated by color coded symbols: ▲ = canonical splice variants; ● = frameshift and nonsense variants (nonsense mediated decay predicted to occur); ◆ = cryptic splice variants; — = small deletion spanning an exonic/intronic boundary, and ○ = frameshift and nonsense variants (nonsense mediated decay predicted to not occur). Each variant or cDNA position with more than one observation is designated by vertical stacking. Large deletions are designated by a black line while duplications are designated by a red line.
